# Supplementary material for: Electrochemical Determination of 17-β-Estradiol Using a Glassy Carbon Electrode Modified with α-Fe2O3 Nanoparticles Supported on Carbon Nanotubes
Source: MDPI journal article supplement (doi:10.3390/molecules28176372), 2023-08-31
Supplement: s1 [file s1]

# Supplementary Material

## Electrochemical Determination of 17- $\beta$ -Estradiol Using a Glassy Carbon Electrode Modified with $\alpha$ -Fe<sub>2</sub>O<sub>3</sub> Nanoparticles Supported on Carbon Nanotubes

Juliana Costa Rolim Galvão, Mayara da Silva Araujo, Maiyara Carlyne Prete, Vanildo Leão Neto, Luiz Henrique Dall'Antonia, Roberto Matos, Cesar Ricardo Texeira Tarley and Roberta Antigo Medeiros \*

Department of Chemistry, State University of Londrina, Londrina 86057-970, PR, Brazil; juliana.costa.rolim@uel.br (J.C.R.G.); asmayara@uel.br (M.d.S.A.); mayprete@gmail.com (M.C.P.); vanildosln@gmail.com (V.L.N.); luizh@uel.br (L.H.D.); rmatos@uel.br (R.M.); tarley@uel.br (C.R.T.T.)

\* Correspondence: ramedeiros@uel.br; Tel.: +55-43-33714811

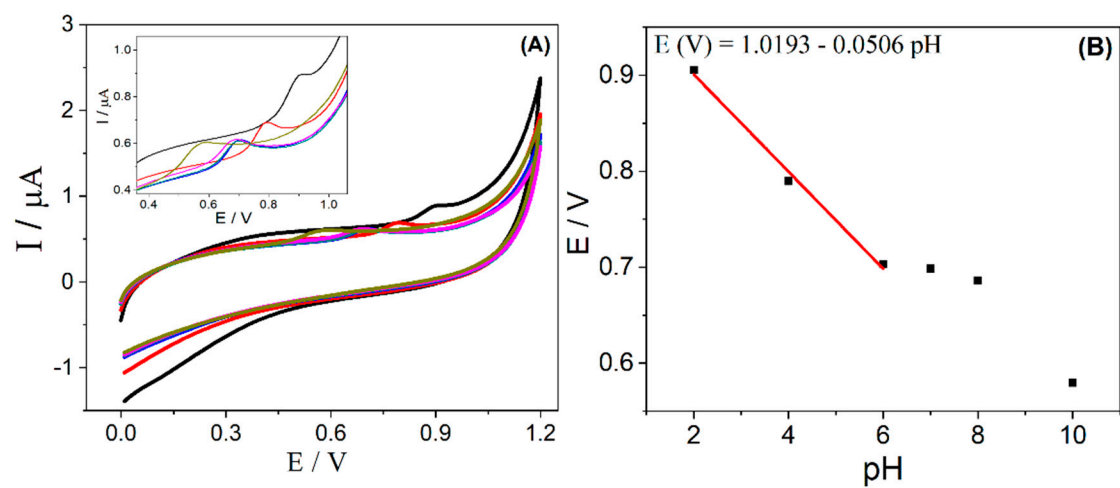

**Figure S1:** Cyclic voltammograms obtained for 0.1 mmol L<sup>-1</sup> of E2 using  $\alpha$ -Fe<sub>2</sub>O<sub>3</sub>-CNT/GCE at different pHs (A)  $E_p$  versus pH plot (B). Supporting electrolyte: 0.1 mol L<sup>-1</sup> KCl solution (10% v/v ethanol) in the presence of 0.1  $\mu$ mol L<sup>-1</sup> E2. Scan rate: 50 mV s<sup>-1</sup>.
